# Supplementary material for: Multicenter, Phase 2, Randomized Controlled Study of the Efficacy and Safety of Etripamil Nasal Spray for the Acute Reduction of Rapid Ventricular Rate in Patients With Symptomatic Atrial Fibrillation (ReVeRA-201)
Source: PubMed Central journal article supplement — Circ Arrhythm Electrophysiol. 2022 Nov 11;16(12):639–50. doi: 10.1161/CIRCEP.123.012567 (PMC10734780; doi:10.1161/circep.123.012567), 2022-11-11
Supplement: hae-16-639-s001.pdf [file hae-16-639-s001.pdf]

## **SUPPLEMENTAL MATERIAL**

### **List of Investigators**

**Supplemental Methods I.** Inclusion and Exclusion Criteria

**Supplemental Methods II.** Treatment Satisfaction Questionnaire for Medication (TSQM-9)

**Supplemental Methods III.** Efficacy Endpoints

**Supplemental Table I.** Proportion of patients achieving  $> 20$  bpm reduction from baseline VR over time

**Supplemental Table II.** Efficacy data (unadjusted for baseline HR) in Efficacy and mITT Populations

**Supplemental Table III.** Secondary Analyses Performed on the Efficacy Population, Sensitivity Analyses Performed on the mITT Population

**Supplemental Table IV.** Sensitivity analysis of differing durations of ventricular rate moving-average

**Supplemental Table V.** Summary of patient satisfaction with treatment measured by Treatment Satisfaction Questionnaire for Medication (TSQM-9) sensitivity analysis (Efficacy and mITT Populations)

**Supplemental Table VI.** Medications Started After Study Drug Administration

**Supplemental Table VII.** Summary of Treatment-Emergent Serious Adverse Events

**Supplemental Table VIII.** Summary of treatment-emergent serious adverse events (TESAEs) by preferred term, system organ class, severity and relation to study drug

## **Investigators (Country / Site / Investigator)**

### **Canada**

Institut de cardiologie de Montréal: Denis Roy, Blandine Mondésert; Hopital Pierre-Legardeur: Gilbert Gosselin; Mauricie/Centre du Québec: Miguel Barrero; Laval - Cité de la Santé: Annie Roy; Estrie - Centre Hospitalier de l'Université Sherbrooke: Jean-Francois Roux; Hopital du Sacré-Coeur: Judy Morris; Québec/Université Laval - Hotel-Dieu: Sebastien-Xavier Joncas; Estrie - Hopital de Granby: Anne Morisset; CISSS des Laurentides - St-Jérôme: Mandana Rasti; Centre Hospitalier de l'Université de Montréal: Isabelle Greiss; CISSS BSL Hôpital de Rimouski: Fabian Alejandro Azzari; QEII HSC - Nova Scotia Health Authority: Amir Abdel Wahab; Ottawa Hospital Civic Campus - Emergency Department: Ian Stiell; Ottawa Hospital General Campus Research Institute: Ian Stiell; Hamilton Health Science – General Site Cardiology: Jorge Wong; PACE (Partners in Advanced Cardiac Evaluation): Yaariv Khaykin

### **Netherlands**

Jeroen Bosch Ziekenhuis: Martijn van Eck; Rijnstate Ziekenhuis: Ron Pisters; Slingeland Ziekenhuis: Dirk Schellings; Treant Zorggroep; Thijs Vet; Elkerliek Ziekenhuis: Francisco Prins; Franciscus Gasthuis: Peter Nierop; Gelre Ziekenhuizen: Nadea Al Windy

### **Trial Networks**

Montreal Health Innovations Coordinating Center (MHICC): Denis Roy, Marie-Claude Guertin, Annik Fortier

Werkgroep Cardiologische Centra Nederland (WCN): Marco Alings, Martin Hemels, Jeroen Schaap, Astrid Schut

## **Methods I. Inclusion and Exclusion Criteria**

### *Inclusion Criteria:*

A patient will be eligible for study participation if they meet all of the following criteria:

1. Aged 18 years and over
2. Has provided written informed consent
3. Patients with episodes of paroxysmal, persistent or permanent AF, presenting with AF and a ventricular rate  $\geq 110$  bpm measured over 1 minute
4. Patients should receive appropriate antithrombotic therapy as per the applicable guidelines for AF management (e.g. Canadian Cardiovascular Society (CCS) / European Society of Cardiology (ESC) guidelines).
  - a. Etripamil (a calcium channel blocker) is intended for acute rate control only. If rhythm control is desired (outside of the present protocol), anticoagulation as per guidelines may start after the administration of study drug.

### *Exclusion criteria:*

A patient will be excluded from the study if they meet any of the following criteria:

1. Has evidence of atrial flutter (ECG) at presentation
2. Has a history of stroke, transient ischemic attack or peripheral embolism within the last 3 months
3. Has received by IV route any of the following within one hour before study drug administration: flecainide, procainamide, digoxin, beta-blocker, or calcium channel blocker
4. Has signs and symptoms of severe congestive heart failure at presentation (e.g. tachypnea, oxygen desaturation  $< 90\%$  unless due to known pulmonary disease, pulmonary rales, sign of peripheral hypoperfusion)
5. Hemodynamic instability, with systolic blood pressure  $< 90$  mmHg or diastolic blood pressure  $< 60$  mmHg
6. Known uncorrected severe aortic or mitral stenosis

7. Hypertrophic cardiomyopathy with outflow tract obstruction
8. Has a history of second- or third-degree atrioventricular block
9. Regular rhythm suggesting a complete AV block
10. Has a history or evidence of torsades de pointes, sick sinus syndrome, or Brugada syndrome
11. Evidence of Acute Coronary Syndrome within the last 12 months except if patient was successfully revascularized
12. Positive pregnancy test result at screening, and females of childbearing potential who do not agree to use adequate method of contraception for the duration of the study.
13. Has evidence of any clinically significant acute or chronic condition of the nasal cavity (e.g., rhinitis or deviated septum) which could interfere with administration of the study drug in either or both nasal cavities
14. Has a history of sensitivity to verapamil
15. Has previously participated in a clinical study for etripamil
16. Has a history of sensitivity to any components of the investigational product
17. Signs of alcohol or drug intoxication at the time of presentation which, in the opinion of the Investigator, would impact the validity of study results
18. Is currently participating in another drug or device study, or has received an investigational drug or device within 30 days of screening
19. Has evidence of clinically significant cardiovascular, endocrine, gastrointestinal, hematologic, hepatic, immunologic, neurologic, oncologic, pulmonary, psychiatric, or renal disease or any other condition which, in the opinion of the Investigator, would jeopardize the safety of the patient or impact the validity of study results

## Methods II. Treatment Satisfaction Questionnaire for Medication (TSQM-9)

After study drug administration, patients will be asked to complete the TSQM-9 (Appendix C). The TSQM-9 is a 9 question, validated, indication agnostic patient reported outcome. It includes 3 items measuring treatment effectiveness, 3 items measuring treatment convenience, and 3 items measuring global satisfaction with treatment. The domain scores range from 0 to 100 with higher scores representing higher satisfaction with the treatment. The formula for calculating each domain score is shown below:

*Effectiveness:*

$$[(\text{Question 1} + \text{Question 2} + \text{Question 3}) - 3] \text{ divided by } 18) \times 100$$

If one item is missing:  $[(\text{Sum}(\text{the two completed items}) - 2] \text{ divided by } 12) * 100$

*Convenience:*

$$[(\text{Question 4} + \text{Question 5} + \text{Question 6}) - 3] \text{ divided by } 18) \times 100$$

If one item is missing:  $[(\text{Sum}(\text{the two completed items}) - 2] \text{ divided by } 12) * 100$

*Global satisfaction:*

$$[(\text{Question 7} + \text{Question 8} + \text{Question 9}) - 3] \text{ divided by } 14) \times 100$$

If either Item 7 or 8 is missing  $[(\text{Sum}(\text{the two completed items})) - 2] \text{ divided by } 10) * 100$

If Item 9 is missing  $[(\text{Sum}(\text{Item7 and Item8})) - 2] \text{ divided by } 8) * 100$

### *TREATMENT SATISFACTION QUESTIONNAIRE FOR MEDICATION (TSQM-9)*

TSQM-9 Abbreviated Treatment Satisfaction Questionnaire for Medication Instructions: Please take some time to think about your level of satisfaction or dissatisfaction with the medication you are taking in this clinical trial. We are interested in your evaluation of the effectiveness and convenience of the medication since you last used it. For each question, please place a single check mark next to the response that most closely corresponds to your own experiences.

1. How satisfied or dissatisfied are you with the ability of the medication to treat your condition?

1 Extremely Dissatisfied 2 Very Dissatisfied 3 Dissatisfied 4 Somewhat Satisfied 5 Satisfied 6 Very Satisfied 7 Extremely Satisfied

2. How satisfied or dissatisfied are you with the way the medication relieves your symptoms? 1 Extremely Dissatisfied 2 Very Dissatisfied 3 Dissatisfied 4 Somewhat Satisfied 5 Satisfied 6 Very Satisfied 7 Extremely Satisfied

3. How satisfied or dissatisfied are you with the amount of time it takes the medication to start working? 1 Extremely Dissatisfied 2 Very Dissatisfied 3 Dissatisfied 4 Somewhat Satisfied 5 Satisfied 6 Very Satisfied 7 Extremely Satisfied

4. How easy or difficult is it to use the medication in its current form? 1 Extremely Dissatisfied 2 Very Dissatisfied 3 Dissatisfied 4 Somewhat Satisfied 5 Satisfied 6 Very Satisfied 7 Extremely Satisfied

5. How easy or difficult is it to plan when you will use the medication each time? 1 Extremely Dissatisfied 2 Very Dissatisfied 3 Dissatisfied 4 Somewhat Satisfied 5 Satisfied 6 Very Satisfied 7 Extremely Satisfied

6. How convenient or inconvenient is it to take the medication as instructed? 1 Extremely Dissatisfied 2 Very Dissatisfied 3 Dissatisfied 4 Somewhat Satisfied 5 Satisfied 6 Very Satisfied 7 Extremely Satisfied

7. Overall, how confident are you that taking this medication is a good thing for you? 1 Extremely Dissatisfied 2 Very Dissatisfied 3 Dissatisfied 4 Somewhat Satisfied 5 Satisfied 6 Very Satisfied 7 Extremely Satisfied

8. How certain are you that the good things about your medication outweigh the bad things? 1 Extremely Dissatisfied 2 Very Dissatisfied 3 Dissatisfied 4 Somewhat Satisfied 5 Satisfied 6 Very Satisfied 7 Extremely Satisfied

9. Taking all things into account, how satisfied or dissatisfied are you with this medication? 1 Extremely Dissatisfied 2 Very Dissatisfied 3 Dissatisfied 4 Somewhat Satisfied 5 Satisfied 6 Very Satisfied 7 Extremely Satisfied

### **Methods III. Efficacy Endpoints**

#### **Primary efficacy variable:**

- Maximum reduction in ventricular rate, measured on Holter monitoring, within 60 minutes from drug administration

#### **Secondary efficacy variables:**

- Elapsed time from drug administration to nadir (lowest average heart rate) in the 60 minutes post drug administration
- Percentage of patients achieving ventricular rate of <100 bpm in the 60 minutes post drug administration
- Elapsed time from drug administration to ventricular rate <100 bpm
- Duration of ventricular rate <100 bpm in the 60 minutes post drug administration
- Percentage of patients with 10% reduction from baseline ventricular rate in the 60 minutes post drug administration
- Elapsed time from drug administration to 10% reduction from baseline ventricular rate
- Duration of 10% reduction from baseline ventricular rate in the 60 minutes post drug administration
- Percentage of patients with 20% reduction from baseline ventricular rate in the 60 minutes post drug administration
- Elapsed time from drug administration to 20% reduction from baseline ventricular rate
- Duration of 20% reduction from baseline ventricular rate in the 60 minutes post drug administration
- Percentage of patients cardioverting into sinus rhythm in the 60 minutes post drug administration
- Elapsed time from drug administration to cardioversion into sinus rhythm

- Area under the curve (AUC) of heart rate over the 60 minutes and the 360 minutes post drug administration; 180 minutes post administration performed as additional analysis
- Patient satisfaction with treatment, as measured by the Treatment Satisfaction Questionnaire for Medication (TSQM-9)

**Safety Variables:**

- Safety variables will include clinical adverse events (AEs), vital signs, and findings from electrocardiographic analysis (ventricular arrhythmia such as premature ventricular contractions, non-sustained ventricular tachycardia, any AV block)



**Supplemental Table I.** Proportion of patients achieving > 20 bpm reduction from baseline VR over time

| Patients achieving<br>> 20 bpm reduction<br>from baseline VR | Efficacy Population*<br>(N=49) |          |             |           |          | mITT Population†<br>(N=56) |          |             |           |          |
|--------------------------------------------------------------|--------------------------------|----------|-------------|-----------|----------|----------------------------|----------|-------------|-----------|----------|
|                                                              | Placebo                        |          | Etripamil   |           | p-value‡ | Placebo                    |          | Etripamil   |           | p-value‡ |
|                                                              | No. at risk                    | n (%)    | No. at risk | n (%)     |          | No. at risk                | n (%)    | No. at risk | n (%)     |          |
| 30 min                                                       | 25                             | 0 (0.0)  | 24          | 15 (62.5) | <0.0001  | 28                         | 0 (0.0%) | 27          | 18 (66.7) | <0.0001  |
| 60 min                                                       | 25                             | 0 (0.0)  | 24          | 13 (54.2) | <0.0001  | 26                         | 0 (0.0%) | 26          | 15 (57.7) | <0.0001  |
| 90 min                                                       | 25                             | 2 (8.0)  | 24          | 13 (54.2) | 0.0005   | 25                         | 2 (8.0)  | 26          | 13 (50.0) | 0.0029   |
| 180 min                                                      | 25                             | 8 (32.0) | 24          | 12 (50.0) | 0.2      | 25                         | 8 (32.0) | 26          | 13 (50.0) | 0.1917   |
| 360 min                                                      | --                             | --       | --          | --        | --       | --                         | --       | --          | --        | --       |

\* The Efficacy Population is comprised of all randomized patients receiving study drug who remained in atrial fibrillation with adequately diagnostic ECG CMS recordings for at least 60 min post drug.

† The mITT Population is comprised of all randomized patients who received the study drug and who had a post-drug ECG CMS recording

‡ By chi-square test

ECG CMS data at 360 min, which was at or just after termination of the recording, contained technical artifact, precluding analysis.

ECG CMS = electrocardiographic cardiac monitoring system

**Supplemental Table II.** Efficacy data (unadjusted for baseline HR) in Efficacy and mITT Populations

| Assessment                                                      | Efficacy Population*    |                             | mITT Population†        |                             |
|-----------------------------------------------------------------|-------------------------|-----------------------------|-------------------------|-----------------------------|
|                                                                 | Placebo NS<br>N=25      | Etripamil NS, 70 mg<br>N=24 | Placebo NS<br>N=29      | Etripamil NS, 70 mg<br>N=27 |
| <b>Baseline Ventricular Rate (bpm)‡</b>                         |                         |                             |                         |                             |
| Mean ± SD                                                       | 135.54 ± 13.93          | 130.33 ± 15.28              | 134.12 ± 16.00          | 128.40 ± 15.79              |
| Median (IQR)                                                    | 135.40 (125.00, 140.20) | 126.90 (122.40, 141.60)     | 135.20 (125.00, 140.20) | 125.40 (118.00, 139.00)     |
| <b>Nadir (bpm)§</b>                                             |                         |                             |                         |                             |
| Mean ± SD                                                       | 130.66 ± 16.37          | 95.18 ± 23.68               | 129.24.66 ± 18.49       | 92.84 ± 23.39               |
| Median (IQR)                                                    | 132.20 (121.20, 137.80) | 96.00 (77.30, 109.50)       | 132.20 (117.00, 137.80) | 94.20 (71.20, 107.80)       |
| <b>Maximum Reduction from Baseline to Nadir (bpm)</b>           |                         |                             |                         |                             |
| Mean ± SD                                                       | -4.88 ± 5.73            | -35.16 ± 23.63              | -4.88 ± 5.86            | -35.56 ± 22.29              |
| Median (IQR)                                                    | -3.80 (-7.60, -1.80)    | -28.10 (-46.80, -19.20)     | -3.80 (-7.60, -1.80)    | -31.40 (-45.00, -19.40)     |
| <b>Elapsed Time (minutes) from Drug Administration to Nadir</b> |                         |                             |                         |                             |
| Mean ± SD                                                       | 32.96 ± 20.07           | 20.25 ± 17.84               | 30.90 ± 20.09           | 18.85 ± 17.35               |
| <b>Patients Achieving a Ventricular Rate &lt;100 bpm</b>        |                         |                             |                         |                             |
| n (%)                                                           | 1 (4.0)                 | 14 (58.3)                   | 3 (10.3)                | 17 (63.0)                   |
| p-value                                                         | -                       | <0.0001                     | -                       | <0.0001                     |
| <b>Duration of Ventricular Rate &lt;100 bpm (minutes)</b>       |                         |                             |                         |                             |
| Mean ± SD                                                       | 7.00 ± na               | 40.93 ± 18.07               | 11.00 ± 12.49           | 42.06 ± 17.62               |
| Median (IQR)                                                    | 7.00 (7.00, 7.00)       | 45.50 (24.00, 56.00)        | 7.00 (1.00, 25.00)      | 47.00 (27.00, 57.00)        |

\* The Efficacy Population is comprised of all randomized patients receiving study drug who remained in atrial fibrillation with adequately diagnostic ECG recordings for at least 60 min post drug

† The mITT Population is comprised of all randomized patients who received the study drug and who had a post-drug ECG CMS recording

‡ Baseline ventricular rate = the average heart rate over the five min immediately prior to drug administration

§ Nadir = the lowest 5-minute moving average heart rate recorded in the 60 min post drug administration

|| Wilcoxon test for censored data

NS= nasal spray, bpm = beats per minute, SD = standard deviation, IQR = interquartile range

**Supplemental Table III.** Secondary Analyses Performed on the Efficacy Population, Sensitivity Analyses Performed on the mITT Population

|                                                                                          | Efficacy Population* |                              | mITT Population†    |                              |
|------------------------------------------------------------------------------------------|----------------------|------------------------------|---------------------|------------------------------|
|                                                                                          | Placebo NS<br>N=25   | Etripamil NS,<br>70 mg, N=24 | Placebo NS<br>N=29  | Etripamil NS,<br>70 mg, N=27 |
| <b>Patients with 10% Reduction from Baseline VR</b>                                      |                      |                              |                     |                              |
| n (%)                                                                                    | 5 (20.0)             | 23 (95.8)                    | 6 (20.7)            | 26 (96.3)                    |
| p-value <sup>§</sup>                                                                     | --                   | <0.0001                      | --                  | <0.0001                      |
| <b>Patients with 20% Reduction from Baseline VR</b>                                      |                      |                              |                     |                              |
| n (%)                                                                                    | 0 (0)                | 16 (66.7)                    | 1 (3.4)             | 19 (70.4)                    |
| p-value <sup>§</sup>                                                                     | --                   | <0.0001                      | --                  | <0.0001                      |
| <b>Duration of 10% Reduction from Baseline VR (minutes)</b>                              |                      |                              |                     |                              |
| Median (IQR)                                                                             | 5.00 (2.00, 6.00)    | 49.00 (30.00, 57.00)         | 3.50 (2.00, 6.00)   | 50.00 (30.00, 58.00)         |
| Mean (95% CI) <sup>‡</sup>                                                               | 5.04 (-3.55, 13.63)  | 43.25 (34.82, 51.69)         | 4.49 (-1.95, 10.94) | 43.89 (36.35, 51.42)         |
| Difference of Means                                                                      | --                   | 38.21 (27.01, 49.42)         | --                  | 39.40 (30.13, 48.66)         |
| p-value                                                                                  | --                   | <0.0001                      | --                  | <0.0001                      |
| <b>Duration of 20% Reduction from Baseline VR (minutes)</b>                              |                      |                              |                     |                              |
| Median (IQR)                                                                             | na                   | 48.00 (14.50, 57.50)         | 1.00 (1.00, 1.00)   | 47.00 (15.00, 58.00)         |
| Mean ± SD <sup>l</sup>                                                                   | na                   | 35.44 ± 23.26                | 1.00 ± na           | 36.32 ± 21.95                |
| Difference of Means                                                                      | --                   | na                           | --                  | 35.18 (-13.29, 83.65)        |
| <b>Patients cardioverting to sinus rhythm in the 60 minutes post drug administration</b> |                      |                              |                     |                              |
| n (%)                                                                                    | --                   | --                           | 2 (6.9)             | 1 (3.7)                      |

|                                                                         |    |          |    |          |
|-------------------------------------------------------------------------|----|----------|----|----------|
| <b>Difference between AUCs of VR over 60 min (AUC<sub>0-60</sub>)</b>   |    |          |    |          |
| p-value <sup>#</sup>                                                    |    | <0.0001  |    | <0.0001  |
| <b>Difference between AUCs of VR over 180 min (AUC<sub>0-180</sub>)</b> |    |          |    |          |
| p-value <sup>**</sup>                                                   |    | <0.00001 |    | <0.00001 |
| <b>Difference between AUCs of VR over 360 min (AUC<sub>0-360</sub>)</b> |    |          |    |          |
| p-value <sup>#</sup>                                                    | -- | 0.0015   | -- | <0.0003  |

\* The Efficacy Population is comprised of all randomized patients receiving study drug who remained in atrial fibrillation with adequately diagnostic ECG recordings for at least 60 min post drug.

† The mITT Population is comprised of all randomized patients who received the study drug and who had a post-drug ECG CMS recording

‡ Using ANCOVA model, adjusting for baseline ventricular rate

§ By chi-square test

|| Unadjusted means reported, as ANCOVA model not suitable given distribution of cases placebo vs etripamil arms

# From ANCOVA model for area under the curve (AUC) adjusting for baseline ventricular rate

\*\* From *t* test of difference between the areas under the curves (AUC) of plots of absolute mean heart rate.

NS = nasal spray, VR = ventricular rate, CI = confidence interval, IQR = interquartile range, SD = Standard deviation.

**Supplemental Table IV.** Sensitivity analysis of differing durations of ventricular rate moving-average

|                                                                         | <b>Duration of Time-Window of Moving Average of VR Used for Measurements</b> |                            |                            |                            |                            |
|-------------------------------------------------------------------------|------------------------------------------------------------------------------|----------------------------|----------------------------|----------------------------|----------------------------|
| <b>Mean Maximum Reduction from Baseline* to Nadir<sup>†</sup> (bpm)</b> | <b>1 min</b>                                                                 | <b>2 min</b>               | <b>3 min</b>               | <b>5 min<sup>§</sup></b>   | <b>10 min</b>              |
| Adjusted Mean (95% CI), Placebo-arm                                     | -8.23<br>(-10.24, -6.23)                                                     | -6.79<br>(-8.99, -4.59)    | -6.12<br>(-8.51, -3.73)    | -5.06<br>(-7.44, -2.67)    | -3.90<br>(-6.31, -1.50)    |
| Adjusted Mean (95% CI), Etripamil-arm                                   | -39.27<br>(-49.77, -28.78)                                                   | -37.02<br>(-47.33, -26.72) | -35.95<br>(-46.21, -25.68) | -34.97<br>(-45.13, -24.81) | -33.39<br>(-43.40, -23.39) |
| Difference of Means (95% CI)                                            | -31.04<br>(-41.70, -20.39)                                                   | -30.23<br>(-40.73, -19.74) | -29.83<br>(-40.32, -19.33) | -29.91<br>(-40.31, -19.52) | -29.49<br>(-39.73, -19.24) |
| p-value <sup>‡</sup>                                                    | <0.0001                                                                      | <0.0001                    | <0.0001                    | <0.0001                    | <0.0001                    |

\* Baseline ventricular rate = the average heart rate over the five min immediately prior to drug administration

<sup>†</sup> Nadir = the lowest moving average heart rate recorded in the 60 min post drug administration

<sup>‡</sup> From ANCOVA model, comparing maximum reductions from baseline (means) for placebo vs. etripamil.

<sup>§</sup> Primary analysis used 5-min moving average

VR = ventricular rate, CI = confidence interval, bpm = beats per minute

**Supplemental Table V.** Summary of patient satisfaction with treatment measured by Treatment Satisfaction Questionnaire for Medication (TSQM-9) sensitivity analysis (Efficacy and mITT Populations)

| Domains                      |              | Efficacy Population* |                      |          | mITT Population†     |                      |          |
|------------------------------|--------------|----------------------|----------------------|----------|----------------------|----------------------|----------|
|                              |              | Placebo<br>(N=25)    | Etripamil<br>(N=24)  | p-value‡ | Placebo<br>(N=29)    | Etripamil<br>(N=27)  | p-value‡ |
| Effectiveness§               | Mean (SD)    | 36.67 (21.64)        | 62.96 (21.59)        | p<0.0001 | 36.97 (24.50)        | 65.43 (21.86)        | p<0.0001 |
|                              | Median (IQR) | 33.33 (22.22, 55.56) | 66.67 (50.00, 77.78) |          | 33.33 (22.22, 55.56) | 66.67 (50.00, 83.33) |          |
| Relief of Symptoms Question¶ | Mean (SD)    | 3.08 (1.29)          | 4.63 (1.35)          | p=0.0002 | 3.10 (1.47)          | 4.78 (1.37)          | p<0.0001 |
|                              | Median (IQR) | 3.00 (2.00, 4.00)    | 5.00 (4.00, 5.50)    |          | 3.00 (2.00, 4.00)    | 5.00 (4.00, 6.00)    |          |
| Global Satisfaction§         | Mean (SD)    | 37.14 (25.42)        | 53.87 (21.17)        | p=0.0161 | 36.45 (25.78)        | 52.65 (22.51)        | p=0.0157 |
|                              | Median (IQR) | 42.86 (14.29, 57.14) | 57.14 (42.86, 71.43) |          | 42.86 (14.29, 57.14) | 57.14 (42.86, 71.43) |          |
| Convenience§                 | Mean (SD)    | 72.00 (16.08)        | 65.28 (12.50)        | p=0.1100 | 71.26 (16.93)        | 63.37 (14.39)        | p=0.667  |
|                              | Median (IQR) | 72.22 (61.11, 83.33) | 66.67 (55.56, 72.22) |          | 72.22 (61.11, 83.33) | 66.67 (50.00, 72.22) |          |

\* The Efficacy Population is comprised of all randomized patients receiving study drug who remained in atrial fibrillation with adequately diagnostic ECG recordings for at least 60 min post drug. Data reported in Table 3 and also shown here for comparison.

† The mITT Population is comprised of all randomized patients who received the study drug and who had a post-drug ECG CMS recording.

‡ p-value was obtained by *t* test.

§ Domain Score measured “satisfaction of effectiveness of treatment” on a 0-100 scale.

|| TSQM-9, Question 2 measured “satisfaction on relief of symptoms” using a 7-point anchored scale.

SD = standard deviation



**Supplemental Table VI. Medications Started After Study Drug Administration**

|                                                                                   | <b>Placebo*</b><br>N=29 | <b>Etripamil*</b><br>N=27 | <b>Total*</b><br>N=56 |
|-----------------------------------------------------------------------------------|-------------------------|---------------------------|-----------------------|
| <b>Medications and time-interval given after study drug administration, n (%)</b> |                         |                           |                       |
| <b>CCB or BB, ≤24 h</b>                                                           | 15 (51.7%)              | 6 (22.2%)                 | 21 (37.5%)            |
| IV NDHP CCB or IV BB, ≤60 min                                                     | 0                       | 0                         | 0                     |
| IV NDHP CCB or IV BB, >60 min and ≤24 h                                           | 2 (6.9%)                | 0                         | 2 (3.6%)              |
| Oral NDHP CCB or Oral BB, ≤60 min                                                 | 0                       | 0                         | 0                     |
| Oral NDHP CCB or Oral BB, >60 min and ≤24 h                                       | 13 (44.8%)              | 6 (22.2%)                 | 19 (33.9%)            |
| <b>Digoxin, IV or PO, ≤24 h</b>                                                   | 6 (20.7%)               | 3 (11.1%)                 | 9 (16.1%)             |
| <b>AAD, ≤24 h</b>                                                                 | 8 (27.6%)               | 8 (29.6%)                 | 16 (28.6%)            |
| IV AAD, ≤60 min                                                                   | 0                       | 0                         | 0                     |
| IV AAD, >60 min and ≤24 h                                                         | 2 (6.9%)                | 1 (3.7%)                  | 3 (5.4%)              |
| Oral AAD, ≤60 min                                                                 | 0                       | 0                         | 0                     |
| Oral AAD, >60 min and ≤24 h                                                       | 6 (20.7%)               | 7 (25.9%)                 | 13 (23.2%)            |

\* Safety Population is comprised of all randomized patients who received study drug

Patients were counted more than once if multiple classes of medications were administered.

AAD = antiarrhythmic drug (included Type IC and III drugs), BB = beta blocker, IV = intravenous, NDHP CCB = non-dihydropyridine calcium channel blocker.

**Supplemental Table VII.** Summary of Treatment-Emergent Serious Adverse Events

| <b>Patients, N (%)</b>                                            | <b>Placebo*<br/>(N= 29)</b> | <b>Etripamil*<br/>(N=27)</b> |
|-------------------------------------------------------------------|-----------------------------|------------------------------|
| Patients with at least one TESAE†                                 | 2 (6.9%)                    | 1 (3.7%)                     |
| Patients with at least one severe TESAE                           | 0 (0.0%)                    | 1 (3.7%)                     |
| Patients with at least one TESAE leading to study discontinuation | 0 (0.0%)                    | 0 (0.0%)                     |
| Patients with at least one TESAE related to study drug            | 0 (0.0%)                    | 1 (3.7%)                     |
| Death                                                             | 0 (0.0%)                    | 0 (0.0%)                     |

\* Safety Population is comprised of all randomized patients who received study drug

† Treatment-Emergent Serious Adverse Events (TESAEs) are serious adverse events (SAEs) with onset date/time within 24 hours after study drug administration. In case of a missing AE onset time, the AE is considered treatment-emergent if onset date is equal to study drug administration date or the next.

**Supplemental Table VIII.** Summary of treatment-emergent serious adverse events (TESAEs) by preferred term, system organ class, severity and relation to study drug

| Patients, n (%)                   | Placebo*<br>(N= 29) |          |                        | Etripamil*<br>(N=27) |          |                        |
|-----------------------------------|---------------------|----------|------------------------|----------------------|----------|------------------------|
|                                   | n (%)               | Severity | Relation to Study Drug | n (%)                | Severity | Relation to Study Drug |
| Patients with at least one TESAE† | 2 (6.9%)‡           |          |                        | 1 (3.7%)             |          |                        |
| <b>Cardiac Disorders</b>          | 2 (6.9%)            | Moderate | Not Related            | 1 (3.7%)             | Severe   | Related                |
| Atrial fibrillation               | 1 (3.4%)            | Moderate | Not Related            | 0 (0.0%)             | -        | -                      |
| Bradyarrhythmia                   | 0 (0.0%)            | -        | -                      | 1 (3.7%)             | Severe   | Related                |
| Intracardiac thrombus             | 1 (3.4%)            | Moderate | Not Related            | 0 (0.0%)             | -        | -                      |
| Myocardial ischemia               | 1 (3.4%)            | Moderate | Not Related            | 0 (0.0%)             | -        | -                      |
| <b>Nervous System Disorders</b>   | 0 (0.0%)            | -        | -                      | 1 (3.7%)             | Severe   | Related                |
| Syncope (vasovagal)               | 0 (0.0%)            | -        | -                      | 1 (3.7%)             | Severe   | Related                |
| <b>Vascular Disorders</b>         | 1 (3.4%)            | Moderate | Not Related            | 0 (0.0%)             | -        | -                      |
| Peripheral artery occlusion       | 1 (3.4%)            | Moderate | Not Related            | 0 (0.0%)             | -        | -                      |

\* Safety Population is comprised of all randomized patients who received the study drug

† Treatment-Emergent Serious Adverse Events (TESAEs) are serious adverse events (SAEs) with onset date/time within 24 hours after study drug administration. In case of a missing AE onset time, the AE is considered treatment-emergent if onset date is equal to study drug administration date or the next.

‡ One placebo patient had TESAEs of intracardiac thrombus and peripheral artery occlusion; another placebo patient had TESAEs of atrial fibrillation and myocardial ischemia.

Subjects reporting multiple TESAEs within a given system organ class/preferred term were counted only once within the category.

MedDRA terms used in table.
